# Supplementary material for: Combinatorial Effects of miRNAs in HSV-2 Infection of Macrophages: An In Silico and In Vitro Integration Approach
Source: MDPI journal article supplement (doi:10.3390/vaccines11091488), 2023-09-14
Supplement: s1 [file s1]

**Supplementary Information**  
**Additional File 1: Tables S1-S10**

**Supplementary Table S1:** Primer sequences used in the SYBR Green based qPCR assays involving amplification of HSV-2 viral genes

| Sl.no. | Gene Type                        | Primer name            | Primer sequence                 |
|--------|----------------------------------|------------------------|---------------------------------|
| 1.     | Ubiquitin E3 ligase ICP0         | $\alpha$ -HSV-2-RL2-F  | 5' -GTTTCAGCACCATCCCGATA- 3'    |
| 2.     |                                  | $\alpha$ -HSV-2-RL2-R  | 5' -GGTTGCCCCGTCCAGATAAA- 3'    |
| 3.     | DNA polymerase catalytic subunit | $\alpha$ -HSV-2-UL30-F | 5' -CGCTCAACACGGACTATTACTT- 3'  |
| 4.     |                                  | $\alpha$ -HSV-2-UL30-R | 5' -CTCGGTGATCTTGGCGTTATT- 3'   |
| 5.     | Glycoprotein C                   | $\alpha$ -HSV-2-UL44-F | 5' -ATGCCGGTTTCCCAACTC- 3'      |
| 6.     |                                  | $\alpha$ -HSV-2-UL44-R | 5' -CGTTTACCATCACCTCCTCTAAG- 3' |
| 7.     | Internal Control                 | GAPDH-F                | 5' -CAAGAGCACAAAGAGGAAGAGAG- 3' |
| 8.     |                                  | GAPDH-R                | 5' -CTACATGGCAACTGTGAGGAG- 3'   |

**Supplementary Table S2:** Primer sequences used for cloning the 3' UTR of the target genes for target validation using Luciferase Assay. The red and the green coloured regions represent the restriction sites for the enzymes MLU1 and HINDIII, respectively.

| Sl.no. | miRNA :<br>Gene Target | Primer name       | Primer sequence                             |
|--------|------------------------|-------------------|---------------------------------------------|
| 1.     | miR-29b :              | 3'UTR-CASPASE-3_F | 5'-GAGAAACGCGTGAGCAAACCTAAGTAC-3'           |
| 2.     | Caspase-3              | 3'UTR-CASPASE-3_R | 5'-GTATATGAAGCTTAACTGATATGCATAGGGACAAATC-3' |
| 3.     | miR-181a :             | 3'UTR-PIK3R1_F    | 5'-CTGATAACGCGTCAAAGCTGCTTTATTC-3'          |
| 4.     | PIK3R1                 | 3'UTR-PIK3R1_R    | 5'-AGTAGAAGAAGCTTCTTCACTTTGCAGTTATTC-3'     |
| 5.     | miR-195 :              | 3'UTR-PIK3R1_F    | 5'-GAAACGCGTCACCATGAGATAGCATT-3'            |
| 6.     | PIK3R1                 | 3'UTR-PIK3R1_R    | 5'-CATTGAAAAGCTTGTAGCTTTAAAAAATACACAGG-3'   |
| 7.     | miR-374a :             | 3'UTR-AKT1_F      | 5'-TTTTCGACGCGTAACCTTTCCG-3'                |
| 8.     | AKT1                   | 3'UTR-AKT1_R      | 5'-AGCAAGCTTTATTGAAGAATTTGGAGGGAAG-3'       |
| 9.     | miR-374a :             | 3'UTR-IL10_F      | 5'-TTACTACGCGTCTCTGTGAACGATTTAGAAAAG-3'     |
| 10.    | IL10                   | 3'UTR-IL10_R      | 5'-GTCAGCTTGAATGGAAGCTTCTGTT-3'             |
| 11.    | miR-211 :              | 3'UTR-SOS1_F      | 5'-AACGACGCGTCTTCAAGATGCAGTATAA-3'          |
| 12.    | SOS1                   | 3'UTR-SOS1_R      | 5'-ACAAAAGCTTTCATGTGGGCCTG-3'               |
| 13.    | miR-211 :              | 3'UTR-CAV1_F      | 5'-TTGCACGCGTCTGTTATGCTGTGA-3'              |
| 14.    | CAV1                   | 3'UTR-CAV1_R      | 5'-AGGAAGCTTCTGTACGACTCAGG-3'               |

**Supplementary Table S3:** Variables identified based on the initial *in vitro* viral inhibition used in Box–Behnken Design

| Factor | Name          | Minimum | Maximum | Coded Low  | Coded High | Mean  | Std. Dev. |
|--------|---------------|---------|---------|------------|------------|-------|-----------|
| A      | anti-miR-195  | 18.44   | 46.44   | -1 ↔ 18.44 | +1 ↔ 46.44 | 32.44 | 8.64      |
| B      | anti-miR-374a | 23.46   | 49.46   | -1 ↔ 23.46 | +1 ↔ 49.46 | 36.46 | 8.02      |
| C      | anti-miR-29b  | 15.99   | 41.99   | -1 ↔ 15.99 | +1 ↔ 41.99 | 28.99 | 8.02      |
| D      | anti-miR-181a | 15.37   | 41.37   | -1 ↔ 15.37 | +1 ↔ 41.37 | 28.37 | 8.02      |
| E      | miR-211       | 15.05   | 41.05   | -1 ↔ 15.05 | +1 ↔ 41.05 | 28.05 | 8.02      |

**Supplementary Table S4: miRNA targets** common to the 4 upregulated miRNAs, or any 3 of the upregulated miRNAs

| Common Targets<br>(All 4 miRNAs) | Common Targets<br>(miR-374, miR-29b,<br>miR-181a) | Common Targets<br>(miR-195, miR-29b,<br>miR-181a) | Common Targets<br>(miR-195, miR-374,<br>miR-181a) | Common Targets<br>(miR-195, miR-374,<br>miR-29b) |
|----------------------------------|---------------------------------------------------|---------------------------------------------------|---------------------------------------------------|--------------------------------------------------|
| PTPN4                            | N4BP2                                             | DCLK1                                             | TNRC6B                                            | ZBTB46                                           |
| PLAG1                            | CAMSAP2                                           | AKT3                                              | KIF1B                                             | CPEB3                                            |
| ZBTB34                           | ABHD18                                            | DDX3X                                             | IPO7                                              | AK4                                              |
| USP42                            | DLG2                                              | RPS6KA3                                           | ARMH4                                             | USP31                                            |
| RNF217                           | MED12L                                            | PLXNC1                                            | RFX3                                              | DENND1B                                          |
| ACVR2B                           | B3GNT5                                            | ACVR2A                                            | LATS1                                             | BCL11B                                           |
| ADAMTS6                          | NEGR1                                             | KCNK10                                            | CBX4                                              | LRP6                                             |
| RORA                             | SRSF10                                            | CLOCK                                             | STXBP5                                            | ZBTB20                                           |
| NOTCH2                           | CAND1                                             | TLL1                                              | ZNRF2                                             | DENND4A                                          |
| ZNF704                           | CRISPLD1                                          | ELMSAN1                                           | ACTR2                                             | MIB1                                             |
| PRKG1                            | RALA                                              | JARID2                                            | G2E3                                              | PRDM11                                           |
| NTRK2                            | YTHDF3                                            | ILDR2                                             | POU2F1                                            | PHACTR2                                          |
| KCNC2                            | PGAP1                                             | MED26                                             | PPM1A                                             | SCAI                                             |
| ZDHHC21                          | ADAMTS19                                          | CAPRIN1                                           | RPS6KA6                                           | NEDD9                                            |
| TMEM33                           | ZBTB41                                            | PRRC2C                                            | SPTLC1                                            | RIC1                                             |
| NEXMIF                           | VPS36                                             | PIK3R1                                            | ETNK1                                             | C16orf72                                         |
| BRWD1                            | TET2                                              | DDX3Y                                             | TCAIM                                             | AFF4                                             |
|                                  | REST                                              | RAB30                                             | TSC22D2                                           | IPO9                                             |
|                                  | DCAF12L1                                          | SLC2A14                                           | CHIC1                                             | LDLRAD4                                          |
|                                  | RMND5A                                            | SLC2A3                                            | FAM135A                                           | ZER1                                             |
|                                  | OSBPL3                                            | OTUD4                                             | ACSL4                                             | UBE2K                                            |
|                                  | MEX3B                                             | KPNA1                                             | MBNL2                                             | TFEC                                             |
|                                  | PLPPR4                                            | PDIK1L                                            | LCOR                                              | CDK6                                             |
|                                  |                                                   | CCNT2                                             | YOD1                                              | CLCN5                                            |
|                                  |                                                   | E2F7                                              | CRIM1                                             |                                                  |
|                                  |                                                   | SPRY4                                             | ADAMTS5                                           |                                                  |
|                                  |                                                   | CCNJ                                              | WSB1                                              |                                                  |
|                                  |                                                   | ERLIN2                                            | GABRA1                                            |                                                  |
|                                  |                                                   | PCDHA8                                            | SLITRK1                                           |                                                  |
|                                  |                                                   | PCDHAC1                                           | PLPP3                                             |                                                  |
|                                  |                                                   | PCDHAC2                                           | ZBTB43                                            |                                                  |
|                                  |                                                   | PCDHA13                                           | DCUN1D1                                           |                                                  |
|                                  |                                                   | PCDHA10                                           | PHIP                                              |                                                  |
|                                  |                                                   | PCDHA5                                            | PPP1R2                                            |                                                  |
|                                  |                                                   | PCDHA6                                            | ELAVL4                                            |                                                  |
|                                  |                                                   | PCDHA11                                           | SLC4A8                                            |                                                  |
|                                  |                                                   | PCDHA3                                            | TBC1D9                                            |                                                  |
|                                  |                                                   | PCDHA4                                            | RAB3IP                                            |                                                  |
|                                  |                                                   | PCDHA1                                            | PIK3C2A                                           |                                                  |
|                                  |                                                   | PCDHA7                                            | AK9                                               |                                                  |
|                                  |                                                   | PCDHA2                                            | ZNF699                                            |                                                  |
|                                  |                                                   | PCDHA12                                           | ONECUT2                                           |                                                  |
|                                  |                                                   | KLF7                                              | PSMF1                                             |                                                  |
|                                  |                                                   | BACH2                                             |                                                   |                                                  |
|                                  |                                                   | PCDHA9                                            |                                                   |                                                  |
|                                  |                                                   | ARMC8                                             |                                                   |                                                  |
|                                  |                                                   | PTEN                                              |                                                   |                                                  |

**Supplementary Table S5:** Top 50 miRNA targets sorted on the basis of degree value in the interaction network. The targets highlighted (in bold) were selected based on the pathway analysis and functional annotation and validated in this study

| <i>Top Over-expressed<br/>miRNA targets</i> | <i>Degree</i> | <i>Top under-expressed miRNA<br/>targets</i> | <i>Degree</i> |
|---------------------------------------------|---------------|----------------------------------------------|---------------|
| <b>AKT1</b>                                 | <b>522</b>    | CCND1                                        | 70            |
| VEGFA                                       | 310           | ESR1                                         | 70            |
| MAPK1                                       | 309           | CREB1                                        | 68            |
| EP300                                       | 291           | <b>CAV1</b>                                  | <b>59</b>     |
| PTEN                                        | 284           | PTPRC                                        | 58            |
| CDC42                                       | 281           | ERBB2                                        | 55            |
| STAT3                                       | 279           | BDNF                                         | 50            |
| TNF                                         | 277           | CDK1                                         | 47            |
| CCND1                                       | 259           | SIRT1                                        | 42            |
| ESR1                                        | 257           | HTT                                          | 42            |
| KRAS                                        | 253           | NTRK2                                        | 42            |
| MAPK8                                       | 249           | JAK2                                         | 41            |
| APP                                         | 240           | CUL3                                         | 38            |
| CDK1                                        | 235           | SHC1                                         | 37            |
| <b>CASP3</b>                                | <b>225</b>    | CDH2                                         | 37            |
| HSPA8                                       | 224           | PRKACB                                       | 36            |
| BDNF                                        | 216           | <b>SOS1</b>                                  | <b>36</b>     |
| SIRT1                                       | 214           | RUNX2                                        | 36            |
| IGF1                                        | 212           | ITPR1                                        | 35            |
| AR                                          | 207           | PDGFRB                                       | 34            |
| FGF2                                        | 204           | PPARGC1A                                     | 32            |
| <b>PIK3R1</b>                               | <b>200</b>    | GNAQ                                         | 32            |
| CREB1                                       | 199           | EZR                                          | 32            |
| FOS                                         | 198           | HGF                                          | 32            |
| HSPA4                                       | 191           | KITLG                                        | 31            |
| RAC1                                        | 188           | WNT2                                         | 31            |
| MDM2                                        | 185           | LAMP1                                        | 31            |
| BTRC                                        | 183           | SP1                                          | 30            |
| NRAS                                        | 180           | CACNA1C                                      | 30            |
| PPP2R1A                                     | 177           | PPP1CC                                       | 30            |
| GRB2                                        | 174           | CDK6                                         | 30            |
| ATM                                         | 173           | ERBB3                                        | 30            |
| SMAD2                                       | 169           | PIK3CB                                       | 29            |
| FYN                                         | 168           | GRM1                                         | 29            |
| CDC5L                                       | 167           | GABRG2                                       | 29            |
| CUL3                                        | 167           | POLR2F                                       | 29            |
| CYCS                                        | 166           | FBXW7                                        | 28            |
| <b>IL10</b>                                 | <b>166</b>    | NR3C1                                        | 28            |
| FBXW7                                       | 165           | FLT1                                         | 27            |
| UBE2D1                                      | 165           | SRSF1                                        | 27            |
| GSK3B                                       | 162           | NEUROD1                                      | 27            |
| IL2                                         | 158           | CAMK2D                                       | 27            |
| SNAP25                                      | 157           | AP2A2                                        | 26            |
| HGF                                         | 152           | MCL1                                         | 26            |
| ELOC                                        | 148           | DLG3                                         | 26            |
| PRKN                                        | 148           | DNM2                                         | 26            |
| IGF1R                                       | 145           | GNAS                                         | 25            |
| MAP2K1                                      | 145           | MBNL1                                        | 25            |
| VHL                                         | 145           | ZEB1                                         | 25            |
| CDC27                                       | 144           | NES                                          | 25            |

**Supplementary Table S6:** The minimum free energy values of the miRNA-mRNA duplex predicted using the miRmap web interface

| miRNA           | Gene   | $\Delta G$ duplex | $\Delta G$ binding |
|-----------------|--------|-------------------|--------------------|
| hsa-miR-181a-5p | PIK3R1 | -12.1             | -10.8805           |
| hsa-miR-195-5p  | PIK3R1 | -13.1             | -14.0455           |
| hsa-miR-211-5p  | CAV1   | -10.7             | -11.8219           |
| hsa-miR-211-5p  | SOS1   | -18.8             | -18.4258           |
| hsa-miR-29b-3p  | CASP3  | -11.4             | -12.3499           |
| hsa-miR-374a-5p | AKT1   | -4                | -4.08062           |
| hsa-miR-374a-5p | IL10   | -3.6              | -4.11916           |

**Supplementary Table S7:** Observed response in Box-Behnken analyses for percent HSV-2 inhibition

| Std. | Run | Space Type | Factor 1            | Factor 2             | Factor 3            | Factor 4             | Factor 5             | Response 1                      |
|------|-----|------------|---------------------|----------------------|---------------------|----------------------|----------------------|---------------------------------|
|      |     |            | A: anti-miR-195(nM) | B: anti-miR-374a(nM) | C: anti-miR-29b(nM) | D: anti-miR-181a(nM) | E: mimic-miR-211(nM) | % Inhibition of HSV-2 Infection |
| 9    | 1   | IBFact     | 32.44               | 23.46                | 28.99               | 28.37                | 15.055               | 90.22922932                     |
| 27   | 2   | IBFact     | 18.44               | 36.46                | 28.99               | 41.37                | 28.055               | 89.41142473                     |
| 41   | 3   | Center     | 32.44               | 36.46                | 28.99               | 28.37                | 28.055               | 86.61599763                     |
| 30   | 4   | IBFact     | 32.44               | 36.46                | 41.99               | 28.37                | 15.055               | 84.55859281                     |
| 26   | 5   | IBFact     | 46.44               | 36.46                | 28.99               | 15.37                | 28.055               | 81.9314074                      |
| 37   | 6   | IBFact     | 32.44               | 23.46                | 28.99               | 15.37                | 28.055               | 83.3080115                      |
| 34   | 7   | IBFact     | 46.44               | 36.46                | 28.99               | 28.37                | 15.055               | 90.74178837                     |
| 28   | 8   | IBFact     | 46.44               | 36.46                | 28.99               | 41.37                | 28.055               | 90.84692146                     |
| 5    | 9   | IBFact     | 32.44               | 36.46                | 15.99               | 15.37                | 28.055               | 92.60462644                     |
| 13   | 10  | IBFact     | 18.44               | 36.46                | 15.99               | 28.37                | 28.055               | 91.36369646                     |
| 31   | 11  | IBFact     | 32.44               | 36.46                | 15.99               | 28.37                | 41.055               | 88.67340246                     |
| 4    | 12  | IBFact     | 46.44               | 49.46                | 28.99               | 28.37                | 28.055               | 87.12855668                     |
| 16   | 13  | IBFact     | 46.44               | 36.46                | 41.99               | 28.37                | 28.055               | 87.03932045                     |
| 2    | 14  | IBFact     | 46.44               | 23.46                | 28.99               | 28.37                | 28.055               | 87.53893532                     |
| 12   | 15  | IBFact     | 32.44               | 49.46                | 28.99               | 28.37                | 41.055               | 83.00276595                     |
| 42   | 16  | Center     | 32.44               | 36.46                | 28.99               | 28.37                | 28.055               | 86.61599763                     |
| 39   | 17  | IBFact     | 32.44               | 23.46                | 28.99               | 41.37                | 28.055               | 90.33436242                     |
| 33   | 18  | IBFact     | 18.44               | 36.46                | 28.99               | 28.37                | 15.055               | 93.90499636                     |
| 15   | 19  | IBFact     | 18.44               | 36.46                | 41.99               | 28.37                | 28.055               | 80.43280208                     |
| 25   | 20  | IBFact     | 18.44               | 36.46                | 28.99               | 15.37                | 28.055               | 82.38507381                     |
| 8    | 21  | IBFact     | 32.44               | 36.46                | 41.99               | 41.37                | 28.055               | 82.02954372                     |
| 36   | 22  | IBFact     | 46.44               | 36.46                | 28.99               | 28.37                | 41.055               | 83.92570363                     |
| 43   | 23  | Center     | 32.44               | 36.46                | 28.99               | 28.37                | 28.055               | 86.61599763                     |
| 23   | 24  | IBFact     | 32.44               | 23.46                | 41.99               | 28.37                | 28.055               | 81.35573977                     |
| 3    | 25  | IBFact     | 18.44               | 49.46                | 28.99               | 28.37                | 28.055               | 89.65484778                     |
| 17   | 26  | IBFact     | 32.44               | 36.46                | 28.99               | 15.37                | 15.055               | 86.51086454                     |
| 19   | 27  | IBFact     | 32.44               | 36.46                | 28.99               | 15.37                | 41.055               | 79.69477981                     |
| 35   | 28  | IBFact     | 18.44               | 36.46                | 28.99               | 28.37                | 41.055               | 77.02890145                     |
| 29   | 29  | IBFact     | 32.44               | 36.46                | 15.99               | 28.37                | 15.055               | 96.19967089                     |
| 18   | 30  | IBFact     | 32.44               | 36.46                | 28.99               | 41.37                | 15.055               | 93.53721546                     |
| 11   | 31  | IBFact     | 32.44               | 23.46                | 28.99               | 28.37                | 41.055               | 76.1929483                      |
| 10   | 32  | IBFact     | 32.44               | 49.46                | 28.99               | 28.37                | 15.055               | 78.39562524                     |
| 32   | 33  | IBFact     | 32.44               | 36.46                | 41.99               | 28.37                | 41.055               | 77.74250808                     |
| 14   | 34  | IBFact     | 46.44               | 36.46                | 15.99               | 28.37                | 28.055               | 92.61652181                     |
| 20   | 35  | IBFact     | 32.44               | 36.46                | 28.99               | 41.37                | 41.055               | 93.28829546                     |
| 1    | 36  | IBFact     | 18.44               | 23.46                | 28.99               | 28.37                | 28.055               | 86.10343859                     |
| 38   | 37  | IBFact     | 32.44               | 49.46                | 28.99               | 15.37                | 28.055               | 82.89763285                     |
| 6    | 38  | IBFact     | 32.44               | 36.46                | 41.99               | 15.37                | 28.055               | 80.53365204                     |
| 24   | 39  | IBFact     | 32.44               | 49.46                | 41.99               | 28.37                | 28.055               | 80.94536112                     |
| 7    | 40  | IBFact     | 32.44               | 36.46                | 15.99               | 41.37                | 28.055               | 96.70510872                     |
| 22   | 41  | IBFact     | 32.44               | 49.46                | 15.99               | 28.37                | 28.055               | 91.8762555                      |
| 40   | 42  | IBFact     | 32.44               | 49.46                | 28.99               | 41.37                | 28.055               | 89.92398377                     |
| 21   | 43  | IBFact     | 32.44               | 23.46                | 15.99               | 28.37                | 28.055               | 92.04539284                     |

**Supplementary Table S8:** Fit summary obtained from Box-Behnken Design run on the suggested models

| Source           | Sequential p-value | Adjusted R <sup>2</sup> | Predicted R <sup>2</sup> | Remark    |
|------------------|--------------------|-------------------------|--------------------------|-----------|
| <b>Linear</b>    | < 0.0001           | 0.6703                  | 0.5997                   | Suggested |
| <b>2FI</b>       | 0.1364             | 0.7217                  | 0.5060                   |           |
| <b>Quadratic</b> | 0.2680             | 0.7403                  | 0.4558                   |           |
| <b>Cubic</b>     | 0.6961             | 0.6878                  | -2.3303                  | Aliased   |

**Supplementary Table S9:** ANNOVA test on the linear model and resultant parameters

| Source           | Sum of Squares | df | Mean Square | F-value | p-value  | Remark      |
|------------------|----------------|----|-------------|---------|----------|-------------|
| <b>Model</b>     | 870.17         | 5  | 174.03      | 18.08   | < 0.0001 | Significant |
| A-anti-miR-195   | 8.24           | 1  | 8.24        | 0.8563  | 0.3608   |             |
| B-anti-miR-374a  | 0.6736         | 1  | 0.6736      | 0.0700  | 0.7928   |             |
| C- anti-miR-29b  | 477.94         | 1  | 477.94      | 49.65   | < 0.0001 |             |
| D- anti-miR-181a | 197.48         | 1  | 197.48      | 20.51   | < 0.0001 |             |
| E-miR-211        | 185.84         | 1  | 185.84      | 19.30   | < 0.0001 |             |
| <b>Residual</b>  | 356.18         | 37 | 9.63        |         |          |             |
| Lack of Fit      | 356.18         | 35 | 10.18       |         |          |             |
| Pure Error       | 0.0000         | 2  | 0.0000      |         |          |             |
| <b>Cor Total</b> | 1226.34        | 42 |             |         |          |             |

**Supplementary Table S10:** Composition of optimized formulations of miRNAs with the predicted and experimental values of responses

| Optimized composition        | Response variable | Experimental value | Predicted Value |
|------------------------------|-------------------|--------------------|-----------------|
| anti-miR-195: <b>32.440</b>  | R1- % Inhibition  | <b>96.7051</b>     | <b>95.5946</b>  |
| anti-miR-374a: <b>36.460</b> |                   |                    |                 |
| anti-miR-29b: <b>15.990</b>  |                   |                    |                 |
| anti-miR-181a: <b>41.370</b> |                   |                    |                 |
| miR-211: <b>28.055</b>       |                   |                    |                 |
