# Supplementary material for: Combinatorial Effects of miRNAs in HSV-2 Infection of Macrophages: An In Silico and In Vitro Integration Approach
Source: MDPI journal article supplement (doi:10.3390/vaccines11091488), 2023-09-14
Supplement: s1 [file s1]

A

| Inflammation                                                                                                                                                                                        | Regulation of Acute-Phase Response                                                                                                                                                                                                                                                                                                                                                                                        | Regulation of Cytokine Metabolism                                                                                                                                                                                                                                                                                                                                                                                                                                                                                                                                                                            | Regulation of Cytokine Receptors                                                                                                                                                                                                                                                                                                                                                                                                                                                                                                          | Regulation of Cytokine                                                                                                                                                                                                   | Regulation of Humoral Immune Response                                                                                                                                                                                                                                                                                                                                                                                                                                                                                                                                                                                                         |
|-----------------------------------------------------------------------------------------------------------------------------------------------------------------------------------------------------|---------------------------------------------------------------------------------------------------------------------------------------------------------------------------------------------------------------------------------------------------------------------------------------------------------------------------------------------------------------------------------------------------------------------------|--------------------------------------------------------------------------------------------------------------------------------------------------------------------------------------------------------------------------------------------------------------------------------------------------------------------------------------------------------------------------------------------------------------------------------------------------------------------------------------------------------------------------------------------------------------------------------------------------------------|-------------------------------------------------------------------------------------------------------------------------------------------------------------------------------------------------------------------------------------------------------------------------------------------------------------------------------------------------------------------------------------------------------------------------------------------------------------------------------------------------------------------------------------------|--------------------------------------------------------------------------------------------------------------------------------------------------------------------------------------------------------------------------|-----------------------------------------------------------------------------------------------------------------------------------------------------------------------------------------------------------------------------------------------------------------------------------------------------------------------------------------------------------------------------------------------------------------------------------------------------------------------------------------------------------------------------------------------------------------------------------------------------------------------------------------------|
| hsa-miR-106b-5p<br>hsa-miR-15b-5p<br>hsa-miR-16-5p<br>hsa-miR-17-5p<br>hsa-miR-20a-5p<br>hsa-miR-23b-3p<br>hsa-miR-98-5p<br>hsa-miR-181a-5p<br>hsa-miR-181b-5p<br>hsa-miR-181c-5p<br>hsa-miR-19b-3p | hsa-let-7f-5p<br>hsa-let-7g-5p<br>hsa-miR-106b-5p<br>hsa-miR-125a-5p<br>hsa-miR-17-5p<br>hsa-miR-20a-5p<br>hsa-miR-20b-5p<br>hsa-miR-21-5p<br>hsa-miR-29b-3p<br>hsa-miR-29c-3p<br>hsa-miR-374a-5p<br>hsa-miR-454-3p<br>hsa-miR-98-5p<br>hsa-miR-144-3p<br>hsa-miR-101-3p<br>hsa-let-7a-5p<br>hsa-miR-130a-3p<br>hsa-miR-130b-3p<br>hsa-miR-202-3p<br>hsa-miR-301a-3p<br>hsa-miR-410-3p<br>hsa-miR-449a<br>hsa-miR-548d-3p | hsa-let-7f-5p<br>hsa-let-7g-5p<br>hsa-miR-125a-5p<br>hsa-miR-15b-5p<br>hsa-miR-16-5p<br>hsa-miR-181a-5p<br>hsa-miR-195-5p<br>hsa-miR-23a-3p<br>hsa-miR-23b-3p<br>hsa-miR-30c-5p<br>hsa-miR-23b-3p<br>hsa-miR-30c-5p<br>hsa-miR-30d-5p<br>hsa-miR-30d-5p<br>hsa-miR-374a-5p<br>hsa-miR-424-5p<br>hsa-miR-454-3p<br>hsa-miR-9-5p<br>hsa-miR-98-5p<br>hsa-let-7a-5p<br>hsa-miR-130a-3p<br>hsa-miR-130b-3p<br>hsa-miR-15a-5p<br>hsa-miR-181b-5p<br>hsa-miR-181c-5p<br>hsa-miR-19b-3p<br>hsa-miR-202-3p<br>hsa-miR-301a-3p<br>hsa-miR-302a-3p<br>hsa-miR-302c-3p<br>hsa-miR-410-3p<br>hsa-miR-449a<br>hsa-miR-543 | hsa-let-7f-5p; hsa-let-7g-5p<br>hsa-miR-106b-5p; hsa-miR-125a-5p<br>hsa-miR-15b-5p; hsa-miR-16-5p<br>hsa-miR-17-5p; hsa-miR-195-5p<br>hsa-miR-20a-5p; hsa-miR-20b-5p<br>hsa-miR-21-5p; hsa-miR-23a-3p<br>hsa-miR-23b-3p; hsa-miR-29b-3p<br>hsa-miR-29c-3p; hsa-miR-30c-5p<br>hsa-miR-30d-5p; hsa-miR-424-5p<br>hsa-miR-98-5p; hsa-miR-454-3p<br>hsa-miR-9-5p<br>hsa-let-7a-5p; hsa-miR-15a-5p<br>hsa-miR-19b-3p; hsa-miR-202-3p<br>hsa-miR-656-3p; hsa-miR-130a-3p<br>hsa-miR-130b-3p; hsa-miR-211-5p<br>hsa-miR-301a-3p; hsa-miR-548d-3p | hsa-let-7a-5p; hsa-miR-15a-5p<br>hsa-miR-19b-3p; hsa-miR-202-3p<br>hsa-miR-656-3p; hsa-miR-130a-3p<br>hsa-miR-130b-3p; hsa-miR-211-5p<br>hsa-miR-301a-3p; hsa-miR-548d-3p                                                | hsa-let-7f-5p<br>hsa-let-7g-5p<br>hsa-miR-106b-5p<br>hsa-miR-125a-5p<br>hsa-miR-15b-5p<br>hsa-miR-16-5p<br>hsa-miR-17-5p<br>hsa-miR-195-5p<br>hsa-miR-20a-5p<br>hsa-miR-20b-5p<br>hsa-miR-21-5p<br>hsa-miR-23a-3p<br>hsa-miR-23b-3p<br>hsa-miR-29b-3p<br>hsa-miR-29c-3p<br>hsa-miR-30c-5p<br>hsa-miR-30d-5p<br>hsa-miR-424-5p<br>hsa-miR-454-3p<br>hsa-miR-9-5p<br>hsa-miR-98-5p<br>hsa-let-7a-5p<br>hsa-miR-130a-3p<br>hsa-miR-130b-3p<br>hsa-miR-15a-5p<br>hsa-miR-181b-5p<br>hsa-miR-181c-5p<br>hsa-miR-19b-3p<br>hsa-miR-202-3p<br>hsa-miR-301a-3p<br>hsa-miR-302a-3p<br>hsa-miR-302c-3p<br>hsa-miR-410-3p<br>hsa-miR-449a<br>hsa-miR-543 |
| Autoimmunity                                                                                                                                                                                        | hsa-let-7f-5p<br>hsa-miR-16-5p<br>hsa-miR-17-5p<br>hsa-miR-20a-5p<br>hsa-miR-23a-3p<br>hsa-miR-23b-3p<br>hsa-miR-29c-3p<br>hsa-miR-181a-5p<br>hsa-miR-181b-5p<br>hsa-miR-301a-3p                                                                                                                                                                                                                                          | hsa-let-7f-5p<br>hsa-miR-130a-3p<br>hsa-miR-130b-3p<br>hsa-miR-15a-5p<br>hsa-miR-181b-5p<br>hsa-miR-181c-5p<br>hsa-miR-19b-3p<br>hsa-miR-202-3p<br>hsa-miR-301a-3p<br>hsa-miR-302a-3p<br>hsa-miR-302c-3p<br>hsa-miR-410-3p<br>hsa-miR-449a<br>hsa-miR-543                                                                                                                                                                                                                                                                                                                                                    | hsa-miR-381-3p<br>hsa-miR-449a                                                                                                                                                                                                                                                                                                                                                                                                                                                                                                            | hsa-miR-181a-5p<br>hsa-miR-374a-5p<br>hsa-miR-15a-5p<br>hsa-miR-181b-5p<br>hsa-miR-181c-5p<br>hsa-miR-302a-3p<br>hsa-miR-302c-3p<br>hsa-miR-410-3p<br>hsa-miR-543<br>hsa-miR-301b-3p<br>hsa-miR-144-3p<br>hsa-miR-101-3p | hsa-miR-181a-5p<br>hsa-miR-374a-5p<br>hsa-miR-98-5p<br>hsa-miR-181a-5p<br>hsa-miR-374a-5p<br>hsa-let-7a-5p<br>hsa-miR-15a-5p<br>hsa-miR-19b-3p<br>hsa-miR-202-3p<br>hsa-miR-656-3p<br>hsa-miR-181b-5p<br>hsa-miR-181c-5p<br>hsa-miR-302a-3p<br>hsa-miR-302c-3p<br>hsa-miR-410-3p<br>hsa-miR-543                                                                                                                                                                                                                                                                                                                                               |
|                                                                                                                                                                                                     | Innate & Adaptive Immunity                                                                                                                                                                                                                                                                                                                                                                                                |                                                                                                                                                                                                                                                                                                                                                                                                                                                                                                                                                                                                              |                                                                                                                                                                                                                                                                                                                                                                                                                                                                                                                                           |                                                                                                                                                                                                                          |                                                                                                                                                                                                                                                                                                                                                                                                                                                                                                                                                                                                                                               |
|                                                                                                                                                                                                     | hsa-miR-17-5p<br>hsa-miR-20a-5p<br>hsa-miR-9-5p<br>hsa-miR-181a-5p<br>hsa-miR-19b-3p                                                                                                                                                                                                                                                                                                                                      |                                                                                                                                                                                                                                                                                                                                                                                                                                                                                                                                                                                                              |                                                                                                                                                                                                                                                                                                                                                                                                                                                                                                                                           |                                                                                                                                                                                                                          |                                                                                                                                                                                                                                                                                                                                                                                                                                                                                                                                                                                                                                               |

B

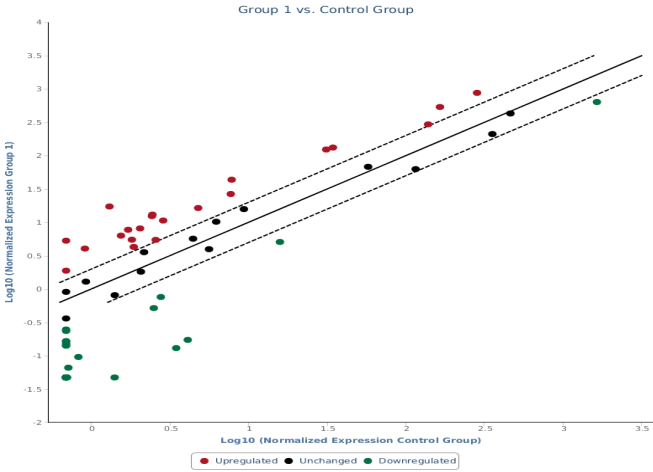

C

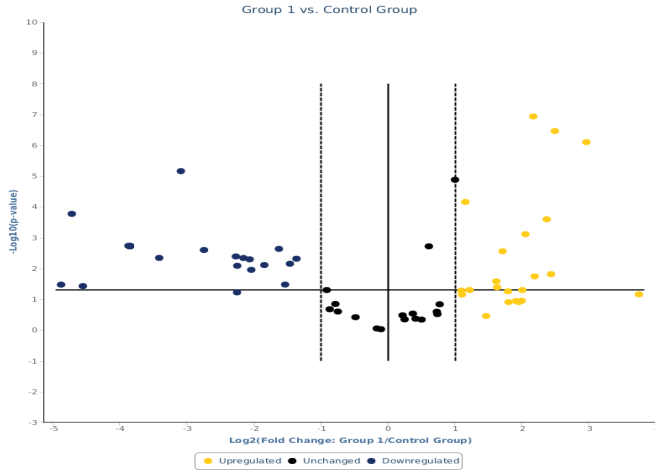

Figure S1

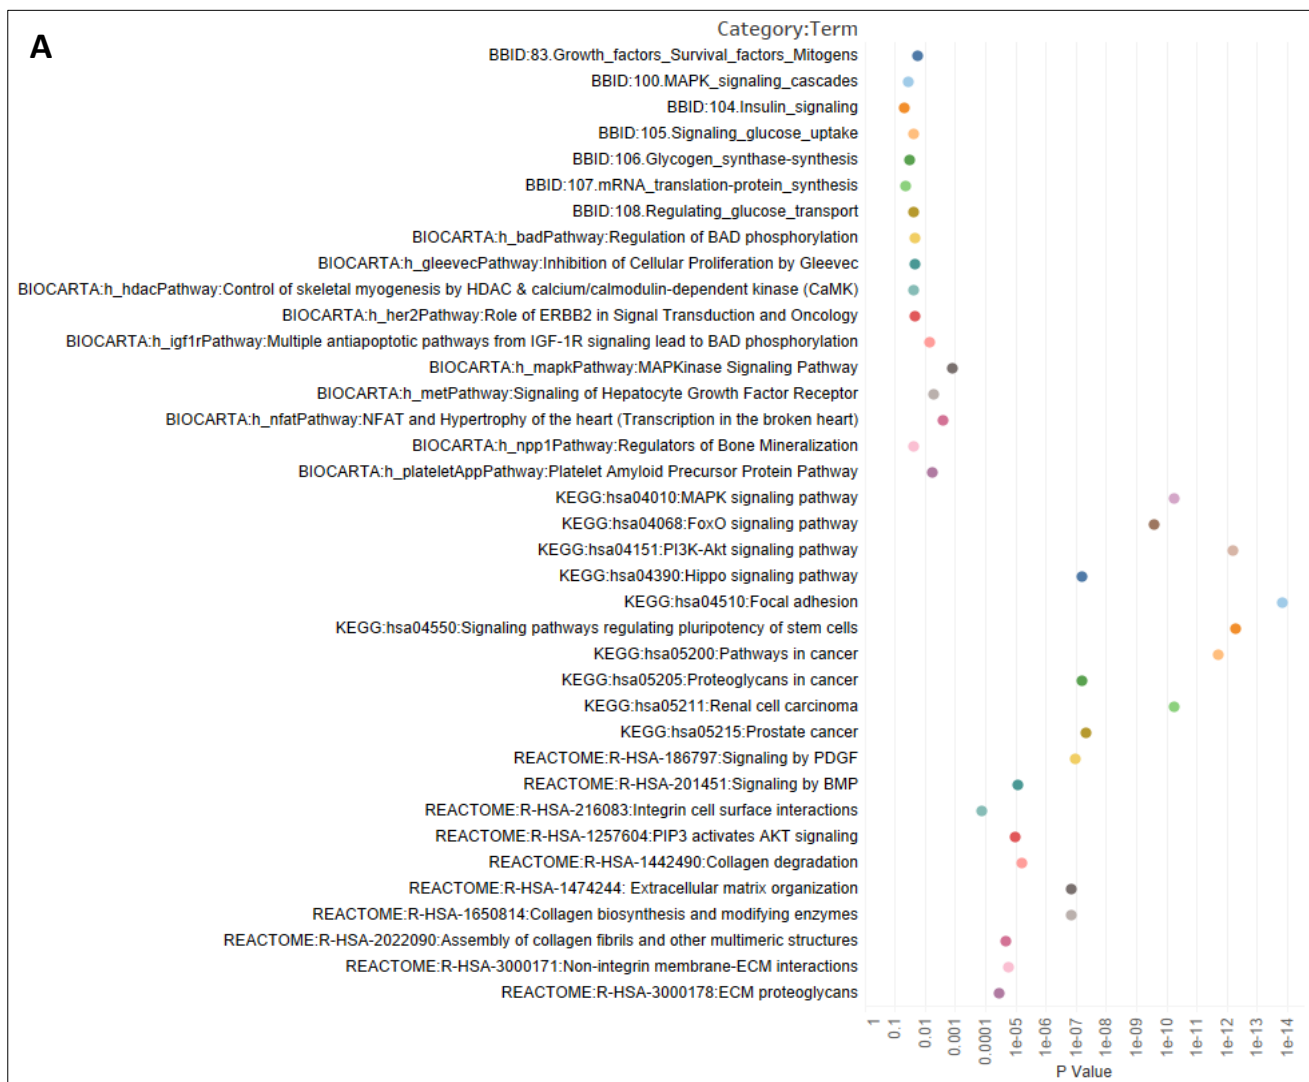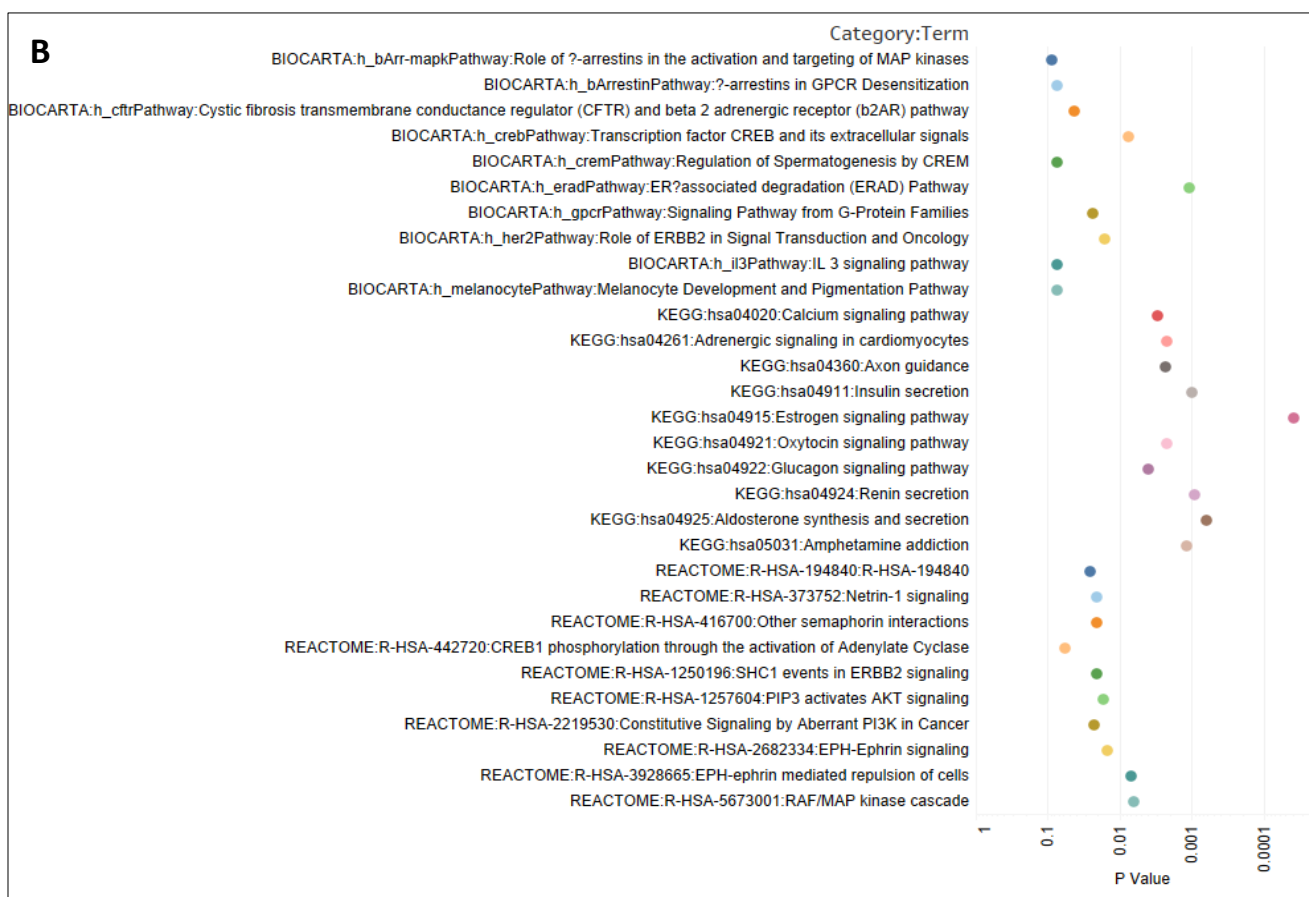

**Figure S2**

A

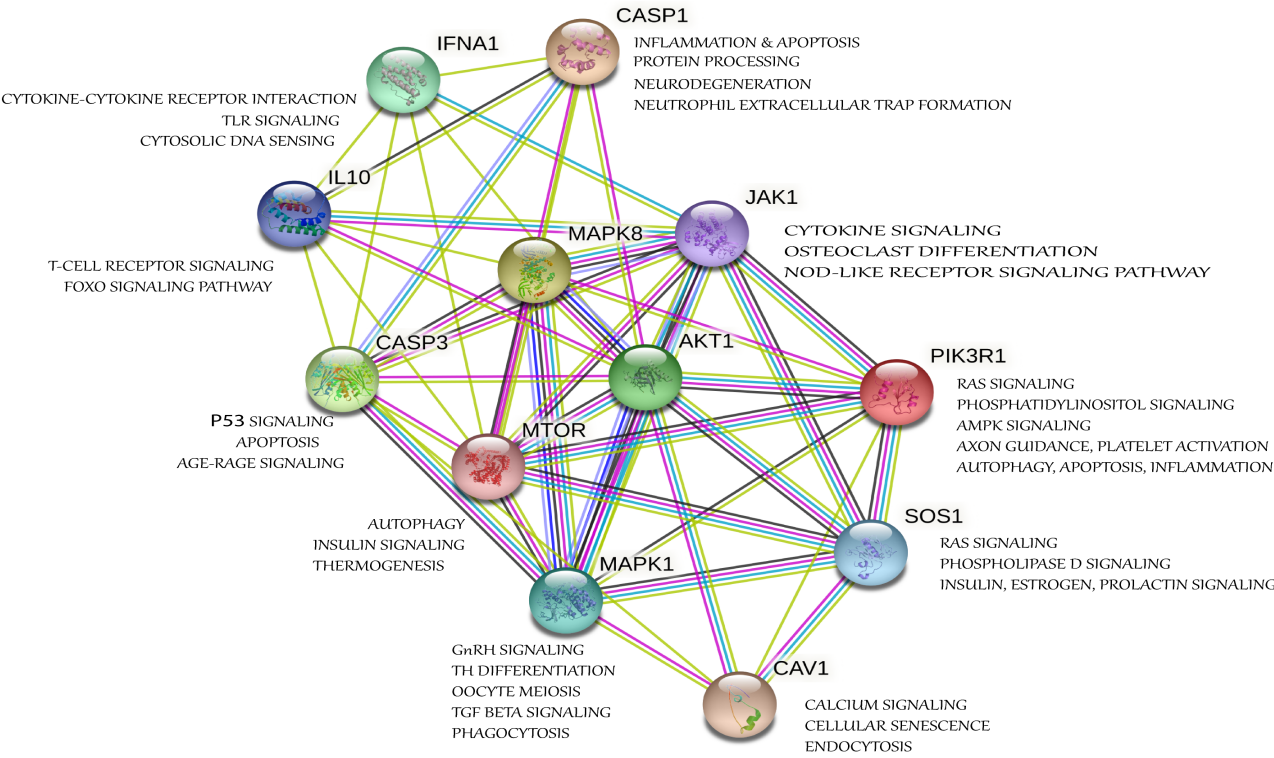

B

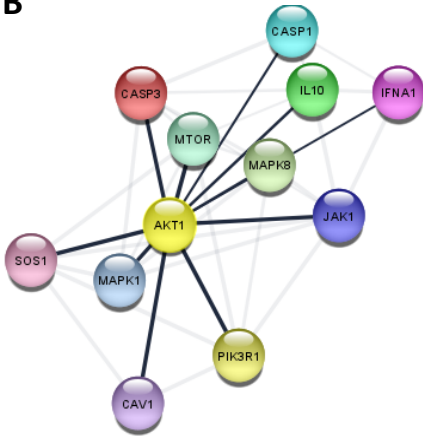

C

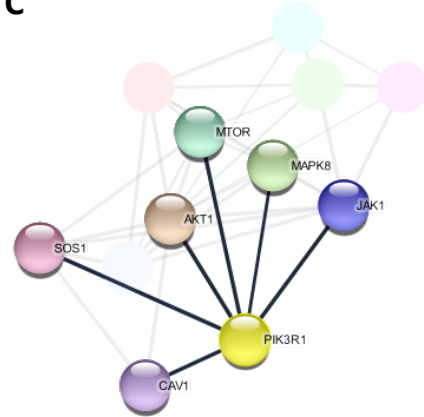

D

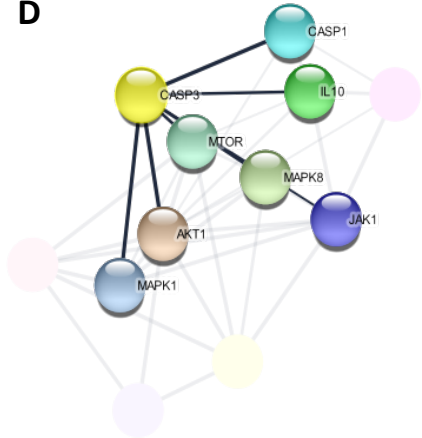

E

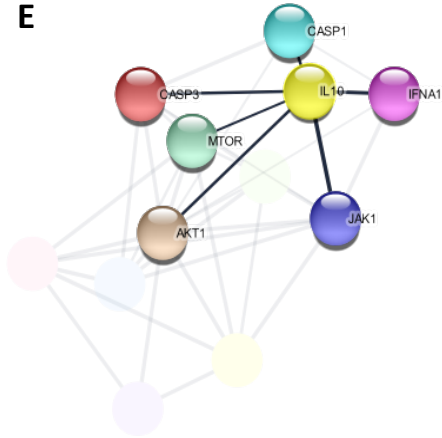

F

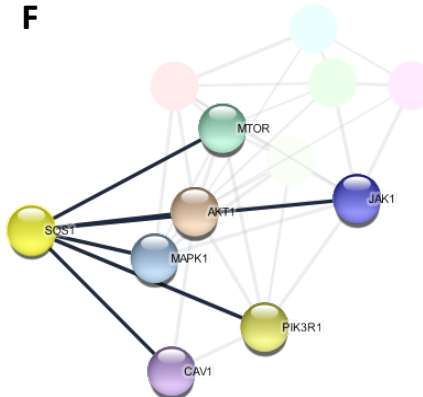

G

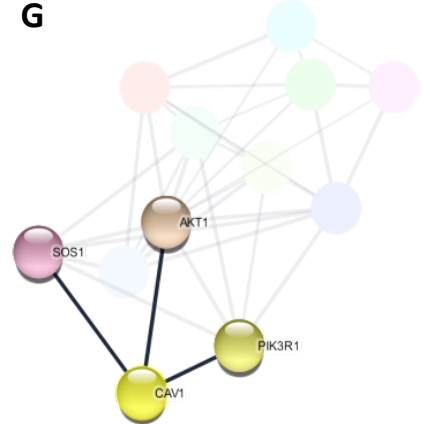

Figure S3

A

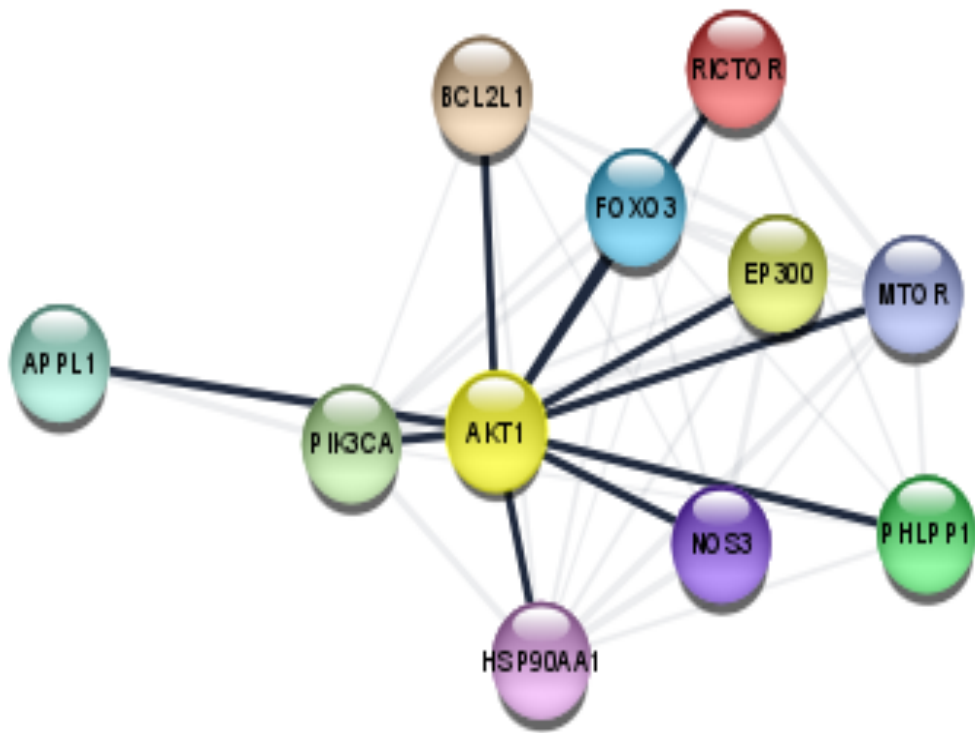

B

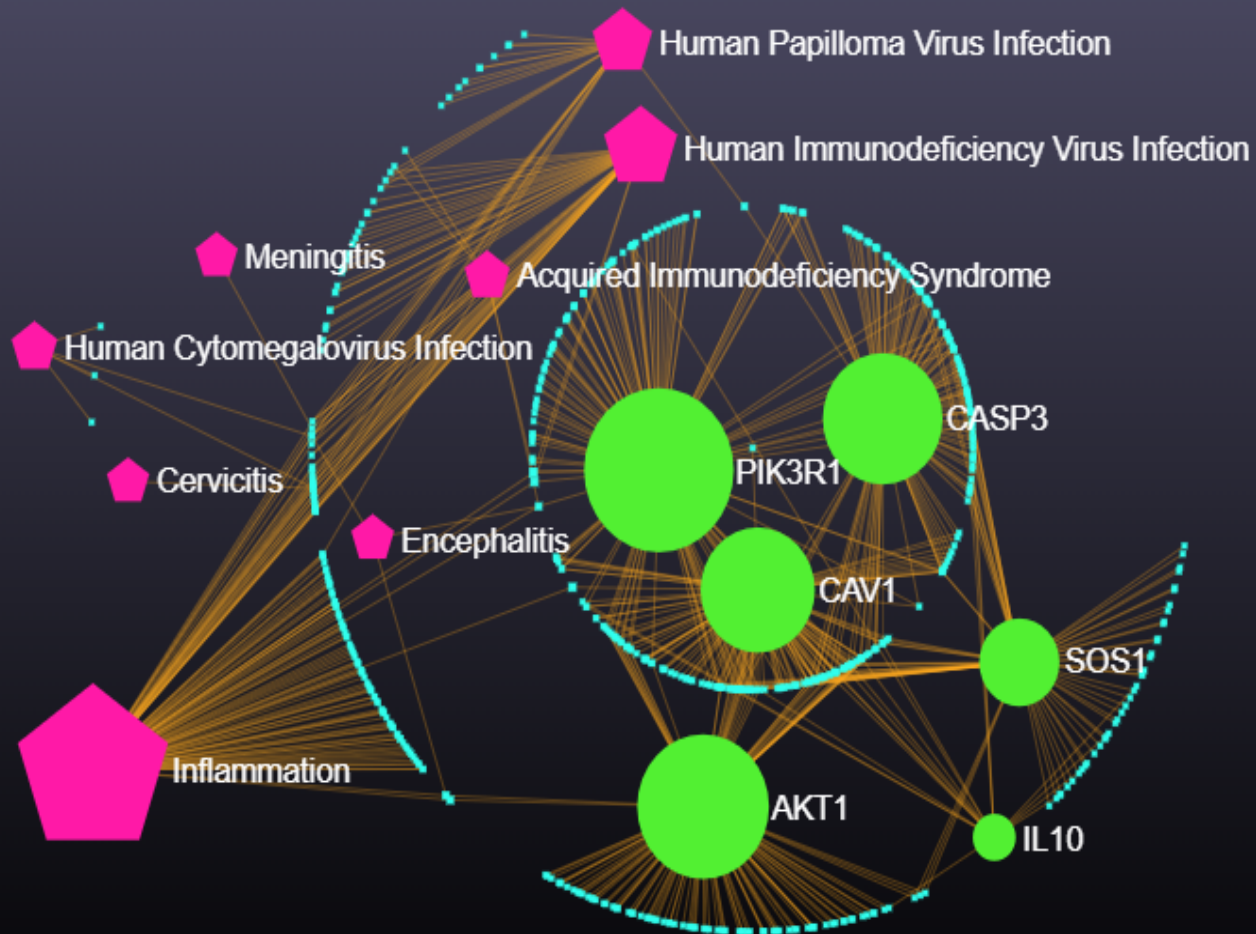

Figure S4

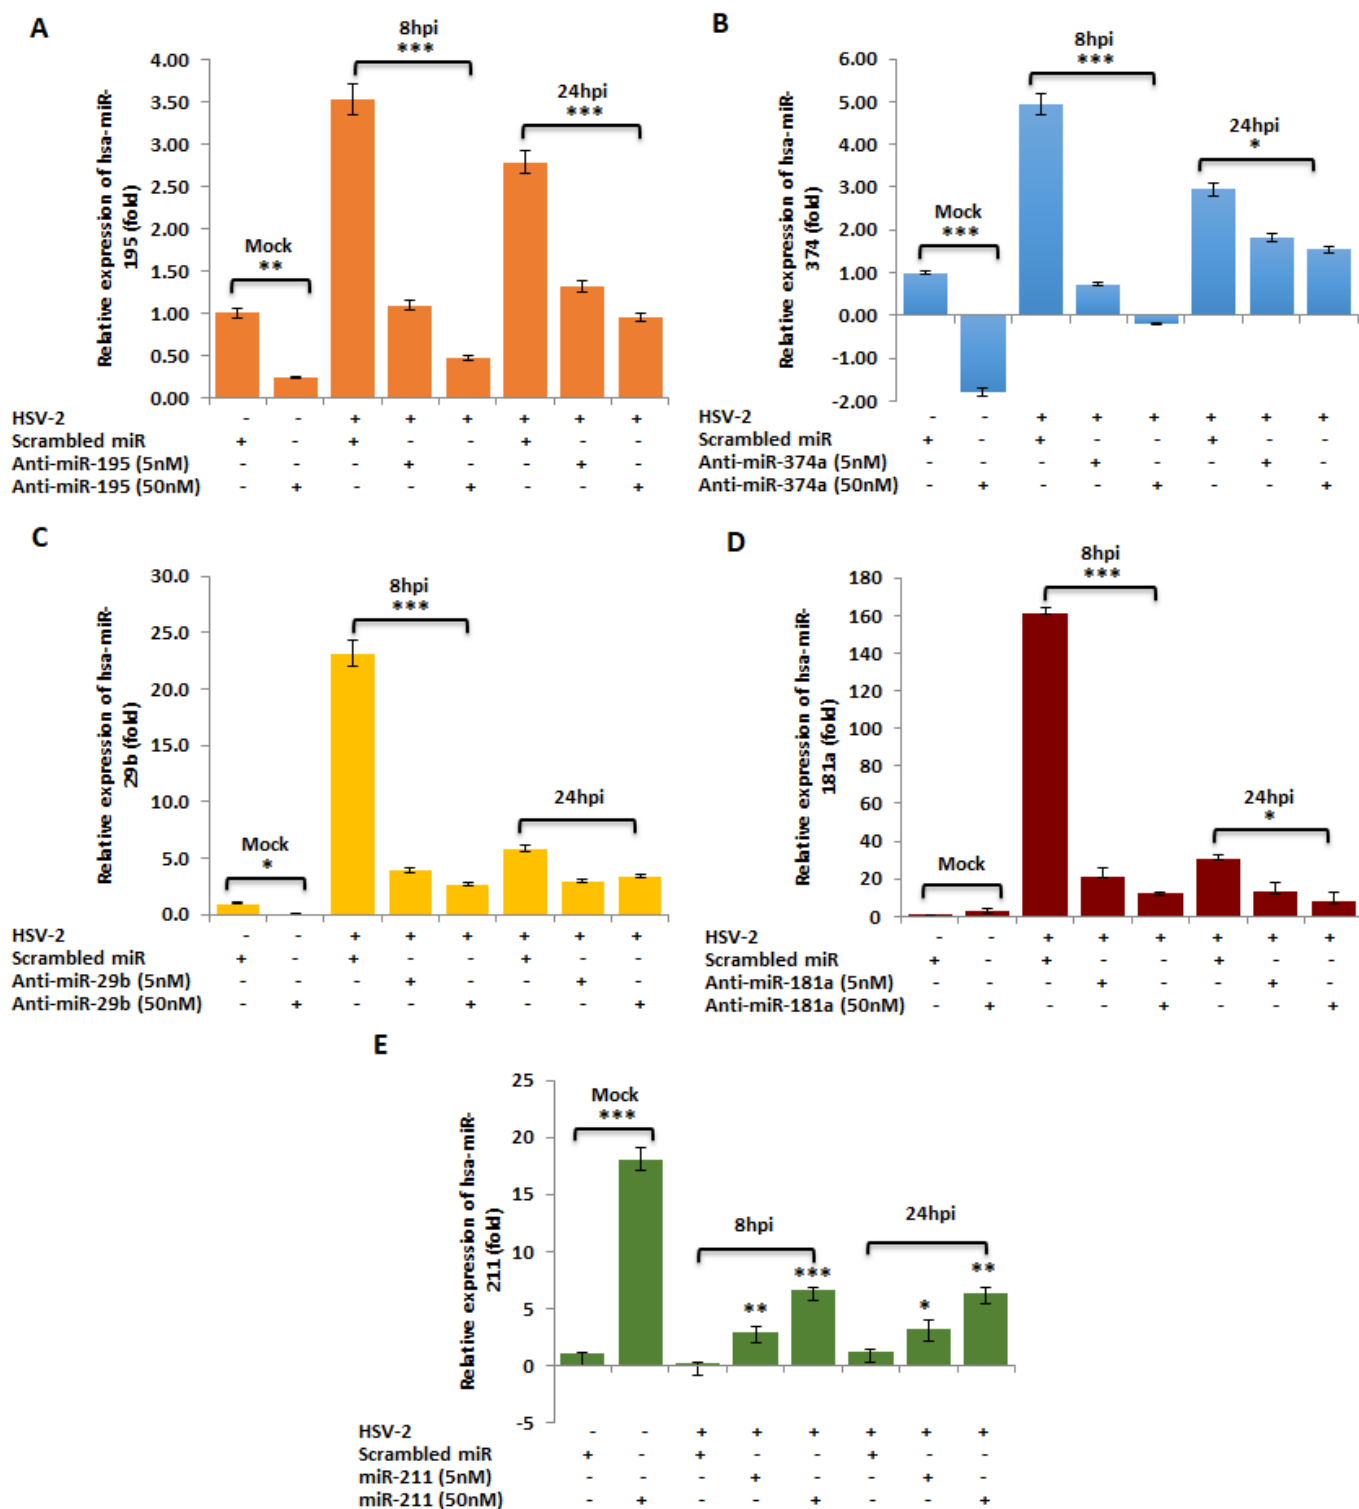

Figure S5

A

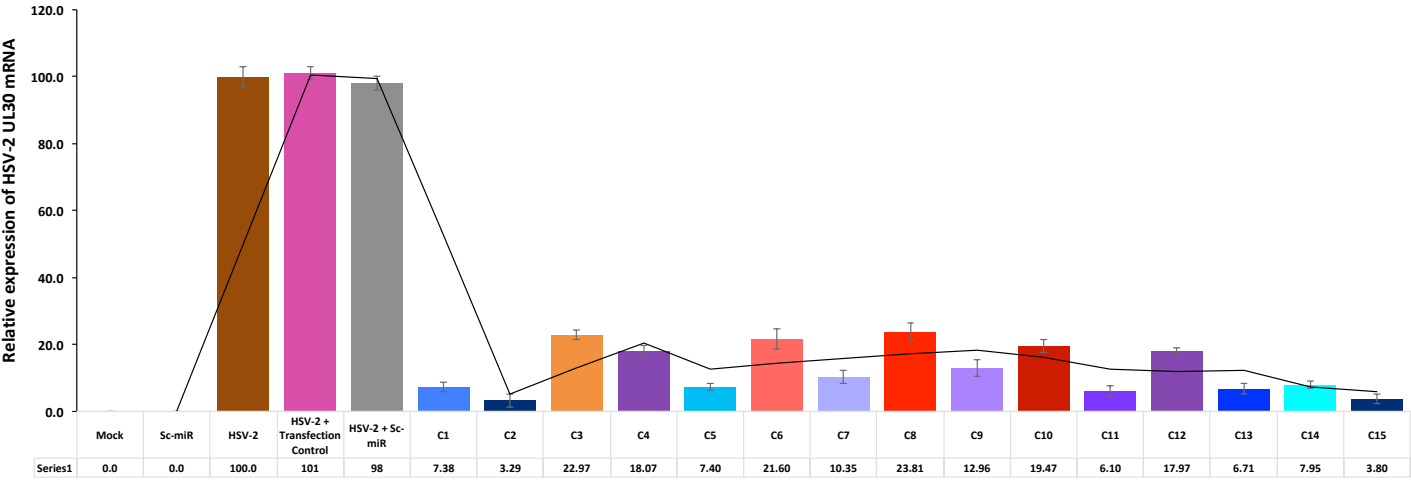

B

| Combination Name | STD | RUN | Anti-miR-195 | Anti-miR-374a | Anti-miR-29b | Anti-miR-181a | mimic-miR-211 | Total conc. In combination (nM) | Working Conc. | % Inhibition of HSV-2 |
|------------------|-----|-----|--------------|---------------|--------------|---------------|---------------|---------------------------------|---------------|-----------------------|
| C1               | 14  | 1   | 46.44        | 36.46         | 15.99        | 28.37         | 28.055        | 155.315                         | 50nM          | 92.61652181           |
| C2               | 7   | 4   | 32.44        | 36.46         | 15.99        | 41.37         | 28.055        | 154.315                         | 50nM          | 96.70510872           |
| C3               | 35  | 7   | 18.44        | 36.46         | 28.99        | 28.37         | 41.055        | 153.315                         | 50nM          | 77.02890145           |
| C4               | 26  | 10  | 46.44        | 36.46         | 28.99        | 15.37         | 28.055        | 155.315                         | 50nM          | 81.9314074            |
| C5               | 5   | 12  | 32.44        | 36.46         | 15.99        | 15.37         | 28.055        | 128.315                         | 50nM          | 92.60462644           |
| C6               | 10  | 14  | 32.44        | 49.46         | 28.99        | 28.37         | 15.055        | 154.315                         | 50nM          | 78.39562524           |
| C7               | 3   | 17  | 18.44        | 49.46         | 28.99        | 28.37         | 28.055        | 153.315                         | 50nM          | 89.65484778           |
| C8               | 11  | 20  | 32.44        | 23.46         | 28.99        | 28.37         | 41.055        | 154.315                         | 50nM          | 76.1929483            |
| C9               | 16  | 22  | 46.44        | 36.46         | 41.99        | 28.37         | 28.055        | 181.315                         | 50nM          | 87.03932045           |
| C10              | 6   | 25  | 32.44        | 36.46         | 41.99        | 15.37         | 28.055        | 154.315                         | 50nM          | 80.53365204           |
| C11              | 33  | 28  | 18.44        | 36.46         | 28.99        | 28.37         | 15.055        | 127.315                         | 50nM          | 93.90499636           |
| C12              | 8   | 30  | 32.44        | 36.46         | 41.99        | 41.37         | 28.055        | 180.315                         | 50nM          | 82.02954372           |
| C13              | 20  | 35  | 32.44        | 36.46         | 28.99        | 41.37         | 41.055        | 180.315                         | 50nM          | 93.28829546           |
| C14              | 21  | 40  | 32.44        | 23.46         | 15.99        | 28.37         | 28.055        | 128.315                         | 50nM          | 92.04539284           |
| C15              | 29  | 42  | 32.44        | 36.46         | 15.99        | 28.37         | 15.055        | 128.315                         | 50nM          | 96.19967089           |

Figure S6

**A**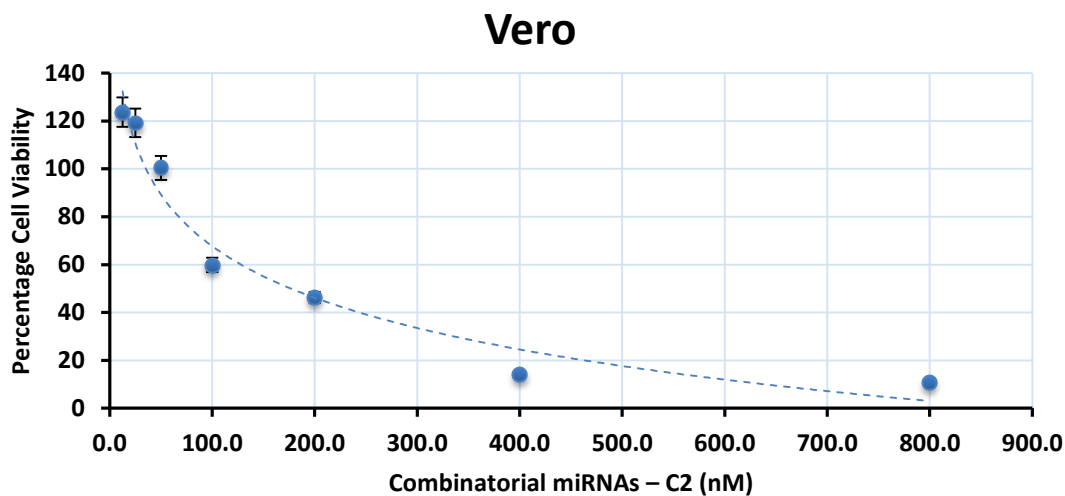**B**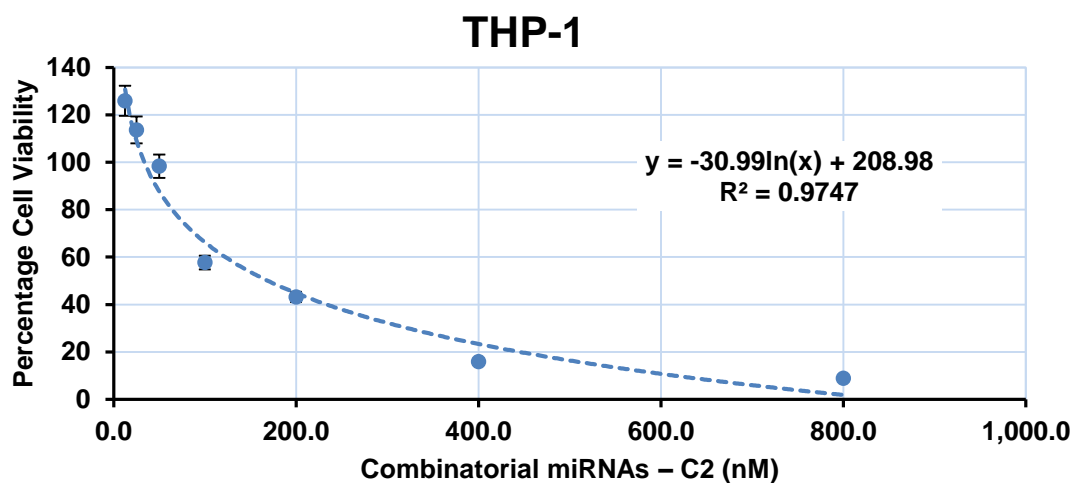**C**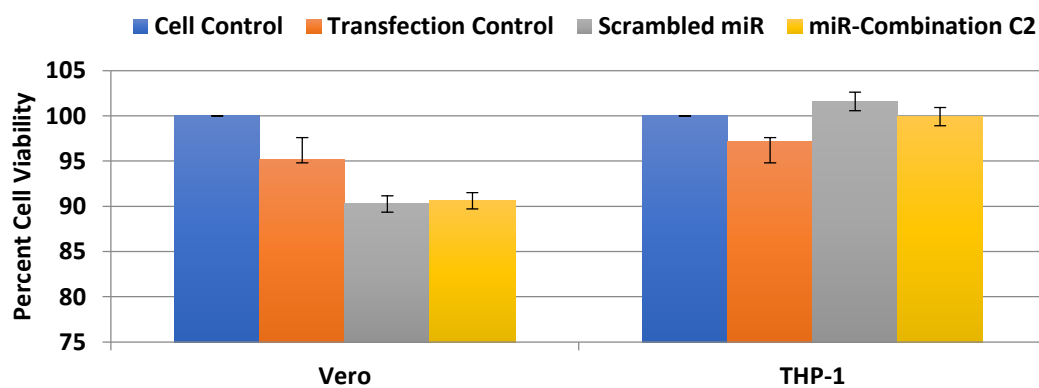**Figure S7**



## Supplementary Figure Legends: S1-S7

**Figure S1:** (A) The cellular processes or events associated with the upregulated and the downregulated miRNAs. The upregulated miRNAs in the HSV-2 infected macrophage samples are represented in red colour while downregulated ones are represented in green. Different representations - (B) Scatter plot (C) Volcano plot- of 43 dysregulated miRNAs in the human inflammatory response pathway-focused miRNA microarray assay using Control Vs. HSV-2 infected samples. Red and yellow indicate the upregulated while green and blue represent the downregulated miRNAs in the scatter and volcano plot, respectively. 43 miRNAs were observed to be differentially expressed between the Control and the HSV-2 infected samples at the  $P < 0.05$  significance level.

**Figure S2:** Top ten over-represented pathways associated with (A) targets of the overexpressed miRNAs and (B) targets of the under-expressed miRNA, as per functional enrichment analysis performed against different pathway databases using DAVID.

**Figure S3:** Gene neighborhood of the selected miRNA targets. (A) STRING Network analysis to reveal the focal point of the target interaction network. The colored nodes represent the miRNA targets and their interactors. Structures within the nodes indicate known 3D structure of their proteins. Different colored edges denote known or predicted interactions from curated databases or are experimentally determined, with fusions, neighborhood, co-occurrence, protein homology or co-expression between them (B-G) First neighbors of each of the miRNA targets. All the network analysis was done using the StringApp in Cytoscape 3.8.2.

**Figure S4:** (A) String network analysis of the known interactions of AKT1 with other target proteins. (B) miRNet visual analytics platform to represent the interaction network of the targets with other miRNAs and the diseases that may become associated with HSV-2 infection. The green, circular nodes represent the miRNA targets, the blue small, circular nodes represent the miRNAs that are already known to target them and the pink, pentagonal nodes represent the diseases that are linked with HSV-2 infection. The edges in orange represent the interactions between the miRNAs, their targets and the HSV-2 associated diseases.

**Figure S5:** Transfection efficiencies of the mimic or inhibitors of the miRNAs. (A-D) The fold-change in relative expression of the miRNAs in samples transfected with inhibitors of miR-195, miR-374a, miR-29b or miR-181a at 5nM or 50nM transfected concentrations. (E) The fold-change in relative expression of the miRNAs in samples transfected with the mimic of miR-211 at 5nM or 50nM transfected concentrations.

**Figure S6:** Representation of *in vitro* validation of the selected 15 miRNA combinations based on the degree of HSV-2 inhibition. Out of the 15 combinations tested for their relative inhibitory effect on the HSV-2 UL30 gene transcription, the highest relative inhibitory effect was observed in the C2 combination (~97%), followed by C15 (~96%), with the lowest inhibition obtained by the combination C8 (~76%), when compared with the HSV-2 infected but untransfected samples or samples without treatment. No change in the UL30 expression was observed upon transfection of transfection control or Scrambled miR followed by HSV-2 infection when compared to the untransfected HSV-2 infected samples.

**Figure S7:** Cell viability assay by MTT. The effect of different concentrations of the miRNA combination C2 on (A) Vero epithelial cells and (B) differentiated THP-1 cells. (C) The mean  $CC_{50}$  value of miRNA combination C2 (Yellow) as determined from three independent assays, in comparison to the different controls used in the assay, i.e. Untransfected cell control (Blue), Transfection control-transfected (Orange) and Scrambled miR-transfected (Grey).
